# Supplementary material for: A series of novel mercury(i) selenites and tellurites containing SOJT Mo6+cations
Source: Royal Society of Chemistry journal article supplement (doi:10.1039/c4qi00132j), 2014-10-15
Supplement: c4qi00132j1.pdf [file c4qi00132j1.pdf]

## **A Series of Novel Mercury(I) Selenites and Tellurites Containing SOJT Mo<sup>6+</sup> Cations**

**Xue-Li Cao, Fang Kong, Chun-Li Hu, and Jiang-Gao Mao\***

### **Supporting Information**

Table S1. IR data for Hg<sub>2</sub>MoSeO<sub>6</sub>, β-Hg<sub>2</sub>MoTeO<sub>6</sub> and Hg<sub>2</sub>Mo<sub>2</sub>TeO<sub>9</sub>.

Table S2. The state energies (eV) of the lowest conduction band (L-CB) and the highest valence band (H-VB) of Hg<sub>2</sub>MoSeO<sub>6</sub>, α-Hg<sub>2</sub>MoTeO<sub>6</sub>, β-Hg<sub>2</sub>MoTeO<sub>6</sub> and Hg<sub>2</sub>Mo<sub>2</sub>TeO<sub>9</sub>.

Figure S1. Simulated and experimental XRD powder patterns of Hg<sub>2</sub>MoSeO<sub>6</sub> (a), β-Hg<sub>2</sub>MoTeO<sub>6</sub> (b) and Hg<sub>2</sub>Mo<sub>2</sub>TeO<sub>9</sub> (c).

Figure S2. The coordination geometries around Hg<sup>+</sup> cations (a) and the coordination mode of the tellurite group (b) in α-Hg<sub>2</sub>MoTeO<sub>6</sub>.

Figure S3. The coordination geometries around Hg<sup>+</sup> cations (a) and the coordination mode of the tellurite group (b) in β-Hg<sub>2</sub>MoTeO<sub>6</sub>.

Figure S4. The coordination geometries around Hg<sup>+</sup> cations (a) and the coordination mode of the tellurite group (b) in Hg<sub>2</sub>Mo<sub>2</sub>TeO<sub>9</sub>.

Figure S5. TGA and DSC curves of Hg<sub>2</sub>MoSeO<sub>6</sub> (a), β-Hg<sub>2</sub>MoTeO<sub>6</sub> (b) and

$\text{Hg}_2\text{Mo}_2\text{TeO}_9$  (c).

Figure S6. IR spectra of  $\text{Hg}_2\text{MoSeO}_6$  (a),  $\beta\text{-Hg}_2\text{MoTeO}_6$  (b) and  $\text{Hg}_2\text{Mo}_2\text{TeO}_9$  (c).

Figure S7. Optical diffuse reflectance spectra of  $\text{Hg}_2\text{MoSeO}_6$  (a),  $\beta\text{-Hg}_2\text{MoTeO}_6$  (b) and  $\text{Hg}_2\text{Mo}_2\text{TeO}_9$  (c).

Table S1. IR data for  $\text{Hg}_2\text{MoSeO}_6$ ,  $\beta\text{-Hg}_2\text{MoTeO}_6$  and  $\text{Hg}_2\text{Mo}_2\text{TeO}_9$ .

|                                      | $\nu(\text{Mo-O})$ | $\nu(\text{Te(Se)-O})$ | $\nu(\text{Mo-O-Te(Se)})$ |
|--------------------------------------|--------------------|------------------------|---------------------------|
| $\text{Hg}_2\text{MoSeO}_6$          | 926, 919, 852, 799 | 710                    | 565, 514, 476, 434        |
| $\beta\text{-Hg}_2\text{MoTeO}_6$    | 902, 890, 835, 802 | 772, 743, 670          | 630, 488, 432             |
| $\text{Hg}_2\text{Mo}_2\text{TeO}_9$ | 916, 865, 838      | 719, 651               | 580, 538, 465             |

Table S2. The state energies (eV) of the lowest conduction band (L-CB) and the highest valence band (H-VB) of four compounds

| Compound                                         | k-point                  | L-CB    | H-VB     |
|--------------------------------------------------|--------------------------|---------|----------|
| Hg <sub>2</sub> MoSeO <sub>6</sub>               | G (0.000, 0.000, 0.000)  | 2.37967 | -0.22391 |
|                                                  | Z (0.000, 0.000, 0.500)  | 2.09588 | -0.22611 |
|                                                  | T (-0.500, 0.000, 0.500) | 2.05515 | -0.0151  |
|                                                  | Y (-0.500, 0.000, 0.000) | 2.00846 | -0.22226 |
|                                                  | S (-0.500, 0.500, 0.000) | 2.10684 | -0.20726 |
|                                                  | X (0.000, 0.500, 0.000)  | 2.41997 | -0.3026  |
|                                                  | U (0.000, 0.500, 0.500)  | 2.10284 | -0.24112 |
|                                                  | R (-0.500, 0.500, 0.500) | 2.05513 | -0.08394 |
| $\alpha$ -Hg <sub>2</sub> MoTeO <sub>6</sub>     | G (0.000, 0.000, 0.000)  | 2.23388 | -0.17412 |
|                                                  | Z (0.000, 0.000, 0.500)  | 1.90561 | -0.22908 |
|                                                  | T (-0.500, 0.000, 0.500) | 1.95669 | -0.01492 |
|                                                  | Y (-0.500, 0.000, 0.000) | 1.97193 | -0.12817 |
|                                                  | S (-0.500, 0.500, 0.000) | 2.07563 | -0.11001 |
|                                                  | X (0.000, 0.500, 0.000)  | 2.26734 | -0.20701 |
|                                                  | U (0.000, 0.500, 0.500)  | 1.9297  | -0.25045 |
|                                                  | R (-0.500, 0.500, 0.500) | 1.95764 | -0.0552  |
| $\beta$ -Hg <sub>2</sub> MoTeO <sub>6</sub>      | G (0.000, 0.000, 0.000)  | 2.37232 | 0        |
|                                                  | Z (0.000, 0.000, 0.500)  | 2.37061 | -0.1893  |
|                                                  | T (-0.500, 0.000, 0.500) | 2.39828 | -0.16734 |
|                                                  | Y (-0.500, 0.000, 0.000) | 2.39235 | -0.10826 |
|                                                  | S (-0.500, 0.500, 0.000) | 2.45    | -0.30942 |
|                                                  | X (0.000, 0.500, 0.000)  | 2.42851 | -0.17048 |
|                                                  | U (0.000, 0.500, 0.500)  | 2.45738 | -0.24798 |
|                                                  | R (-0.500, 0.500, 0.500) | 2.46164 | -0.36117 |
| Hg <sub>2</sub> Mo <sub>2</sub> TeO <sub>9</sub> | Z (0.000, 0.000, 0.500)  | 1.94429 | -0.38463 |
|                                                  | G (0.000, 0.000, 0.000)  | 1.95989 | -0.31202 |
|                                                  | Y (0.000, 0.500, 0.000)  | 1.95281 | -0.40158 |
|                                                  | A (-0.500, 0.500, 0.000) | 2.00094 | -0.2354  |
|                                                  | B (-0.500, 0.000, 0.000) | 1.92089 | 0        |
|                                                  | D (-0.500, 0.000, 0.500) | 1.95858 | -0.15148 |
|                                                  | E (-0.500, 0.500, 0.500) | 1.9605  | -0.23011 |
|                                                  | C (0.000, 0.500, 0.500)  | 1.94002 | -0.44692 |

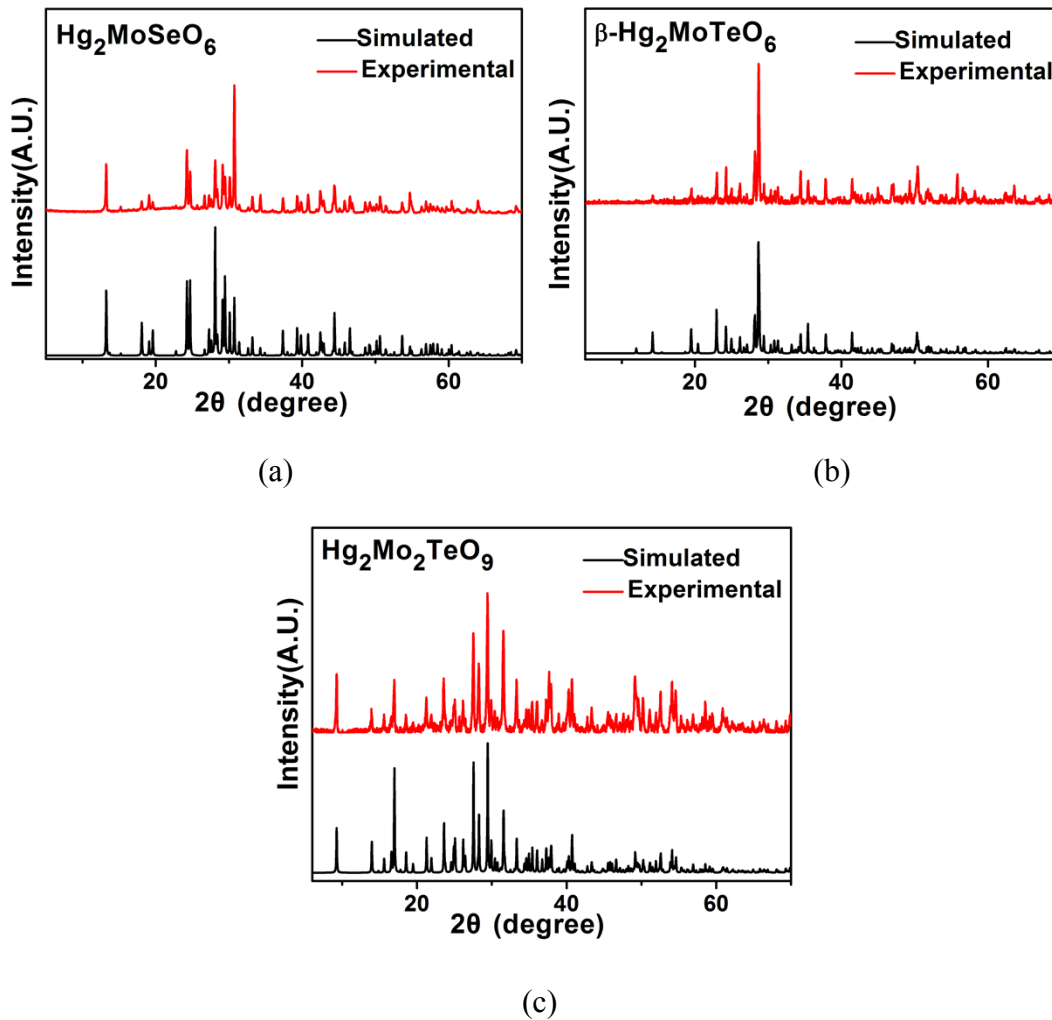

Figure S1. Simulated and experimental XRD powder patterns of  $\text{Hg}_2\text{MoSeO}_6$  (a),  $\beta\text{-Hg}_2\text{MoTeO}_6$  (b) and  $\text{Hg}_2\text{Mo}_2\text{TeO}_9$  (c).

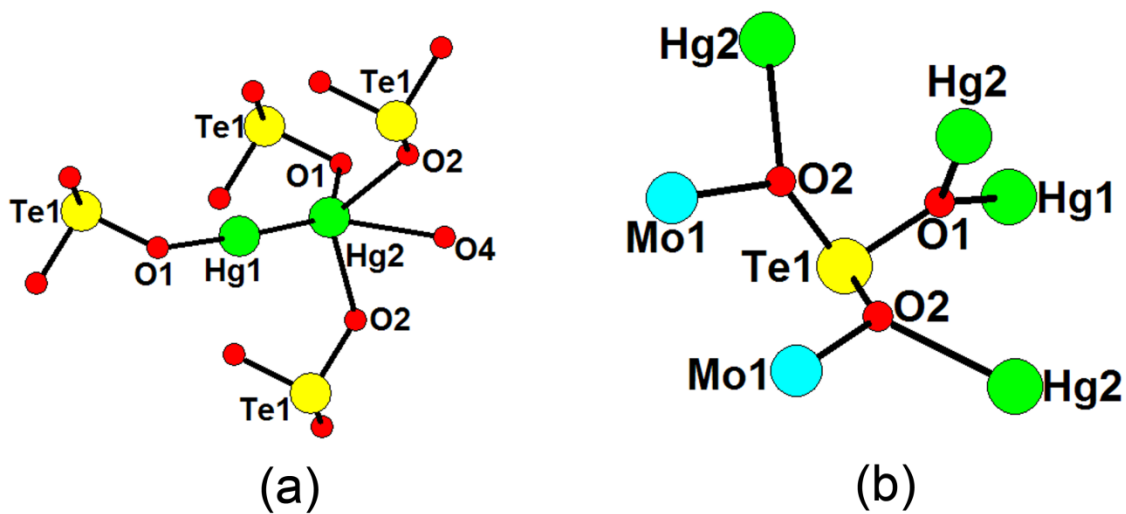

Figure S2. The coordination environment around the Hg<sup>+</sup> cation (a) and the coordination mode of the tellurite group (b) in  $\alpha$ -Hg<sub>2</sub>MoTeO<sub>6</sub>.

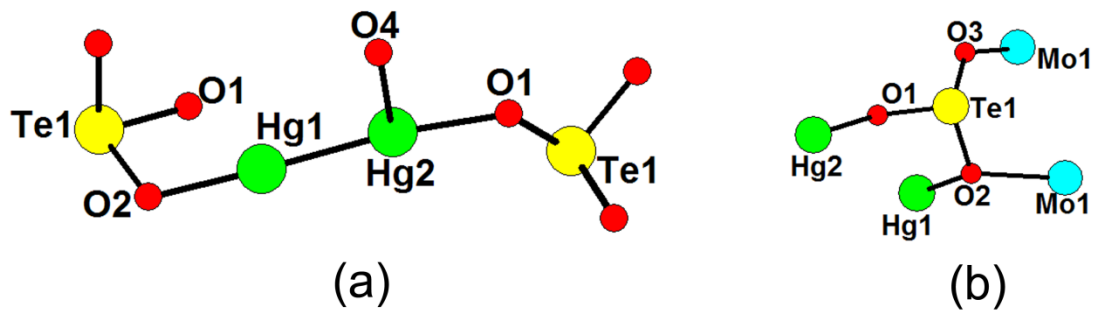

Figure S3. The coordination geometries around Hg<sup>+</sup> cations (a) and the coordination mode of the tellurite group (b) in  $\beta$ -Hg<sub>2</sub>MoTeO<sub>6</sub>.

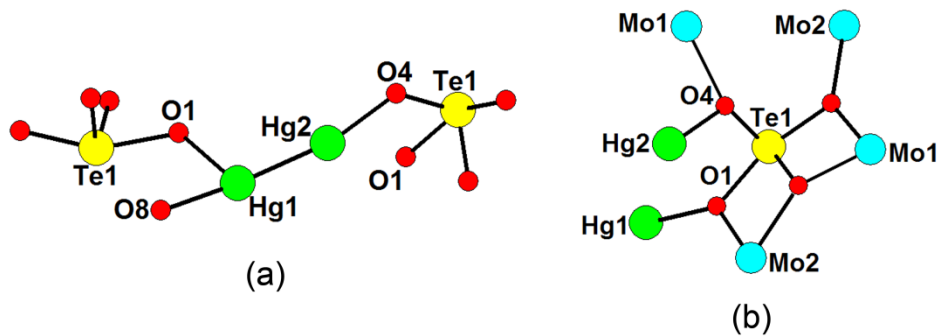

Figure S4. The coordination geometries around  $\text{Hg}^+$  cations (a) and the coordination mode of the tellurite group (b) in  $\text{Hg}_2\text{Mo}_2\text{TeO}_9$ .

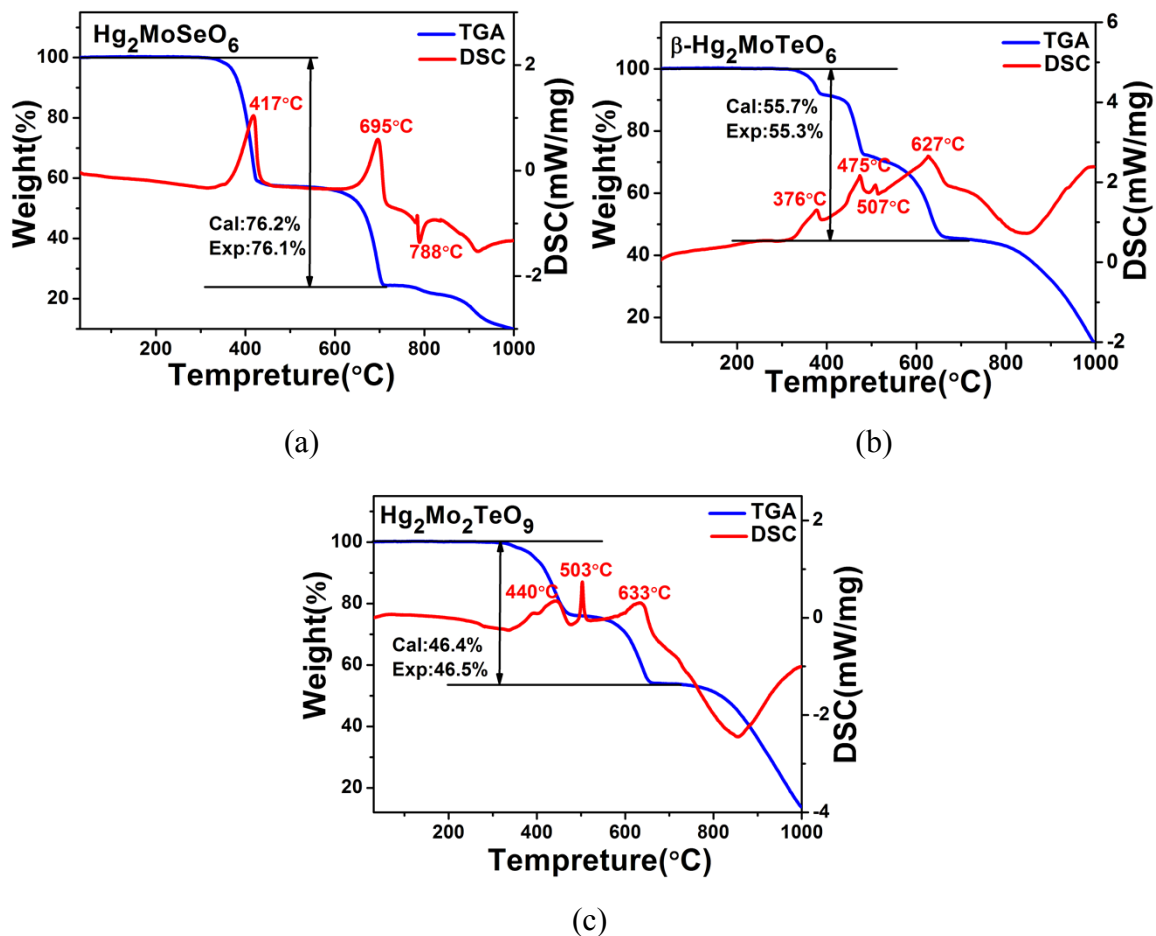

Figure S5. TGA and DSC curves of  $\text{Hg}_2\text{MoSeO}_6$  (a),  $\beta\text{-Hg}_2\text{MoTeO}_6$  (b) and  $\text{Hg}_2\text{Mo}_2\text{TeO}_9$  (c).

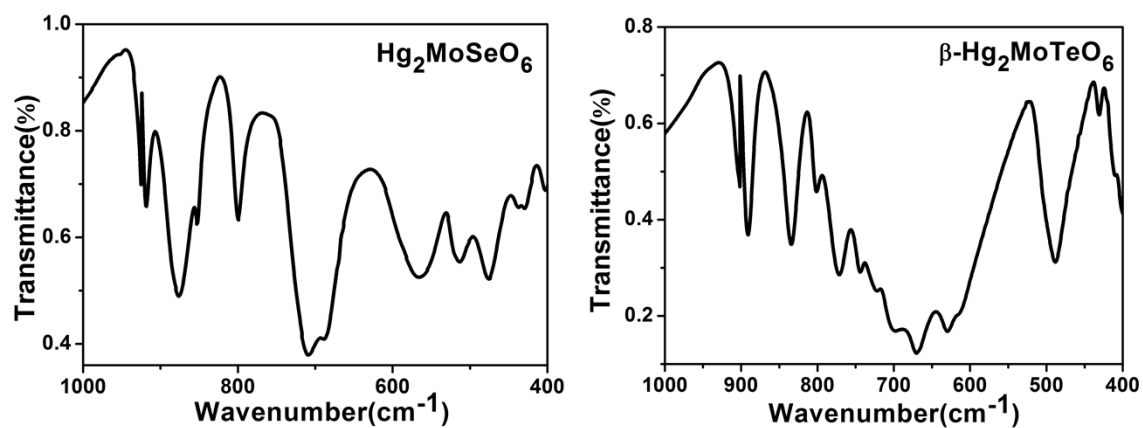

(a)

(b)

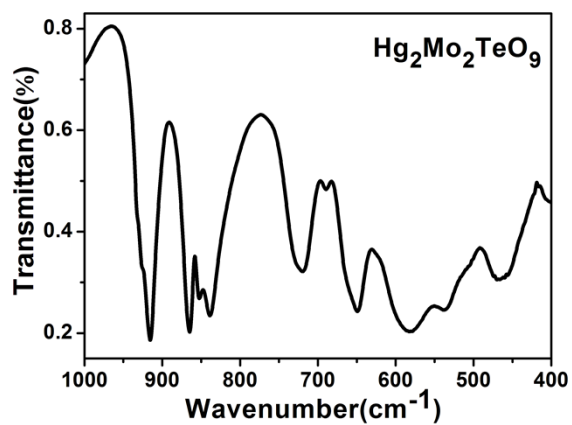

(c)

Figure S6. IR spectra of  $\text{Hg}_2\text{MoSeO}_6$  (a),  $\beta\text{-Hg}_2\text{MoTeO}_6$  (b) and  $\text{Hg}_2\text{Mo}_2\text{TeO}_9$  (c).



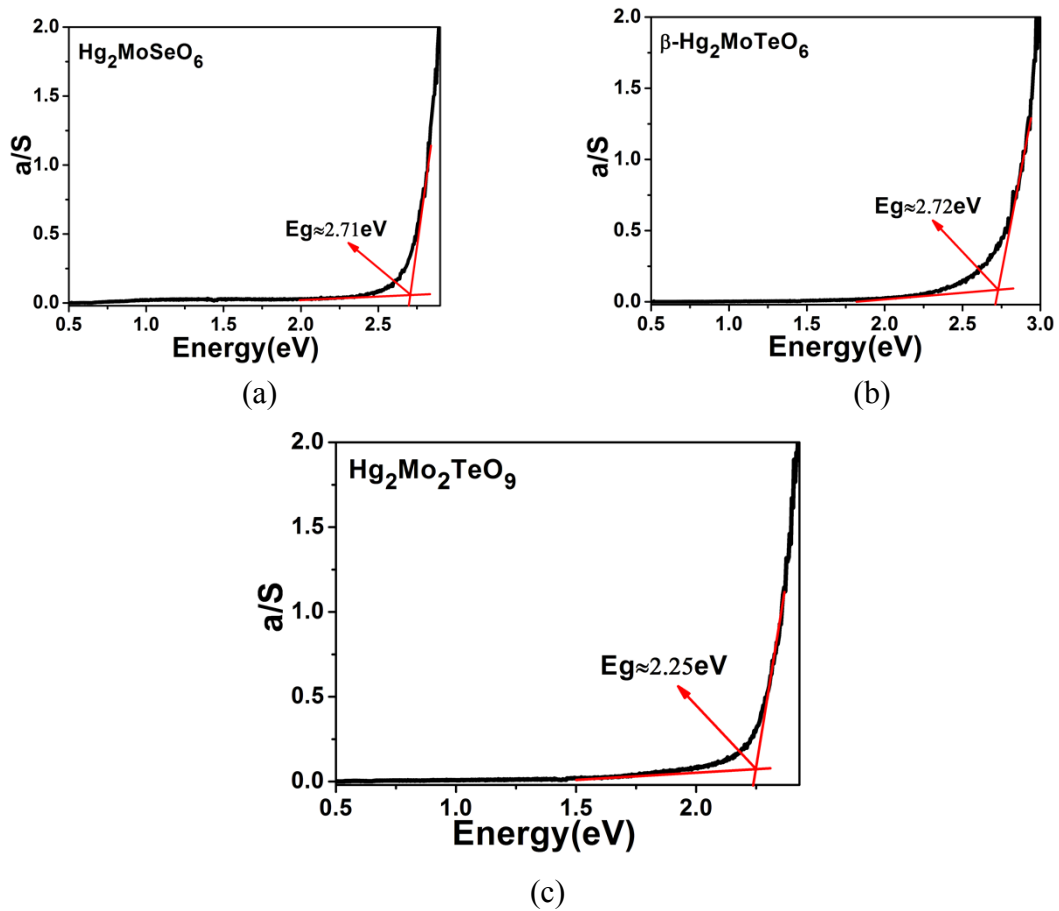

Figure S7. Optical diffuse reflectance spectra of  $\text{Hg}_2\text{MoSeO}_6$  (a),  $\beta\text{-Hg}_2\text{MoTeO}_6$  (b) and  $\text{Hg}_2\text{Mo}_2\text{TeO}_9$  (c).
